# Supplementary material for: Precise synthesis of thermoreversible block copolymers containing reactive furfuryl groups via living anionic polymerization: the countercation effect on block copolymerization behavior
Source: Royal Society of Chemistry journal article supplement (doi:10.1039/c5py00983a), 2015-01-01
Supplement: c5py00983a1.pdf [file c5py00983a1.pdf]

## Supporting Information

### **Precise Synthesis of Thermoreversible Block Copolymers Containing Reactive Furfuryl Groups via Living Anionic Polymerization: Counteraction Effect on Block Copolymerization Behavior**

Beom-Goo Kang,<sup>1</sup> Nabendu B. Pramanik,<sup>2</sup> Nikhil K. Singha,<sup>2</sup> Jae-Suk Lee,<sup>3,\*</sup> Jimmy Mays<sup>1,\*</sup>

<sup>1</sup> Department of Chemistry, University of Tennessee, Knoxville, Tennessee 37996, USA

<sup>2</sup> Rubber Technology Centre, Indian Institute of Technology, Kharagpur 721302, India

<sup>3</sup> School of Materials Science and Engineering, Gwangju Institute of Science and Technology,  
123 Cheomdangwagi-ro, Buk-gu, Gwangju 500-712, Korea

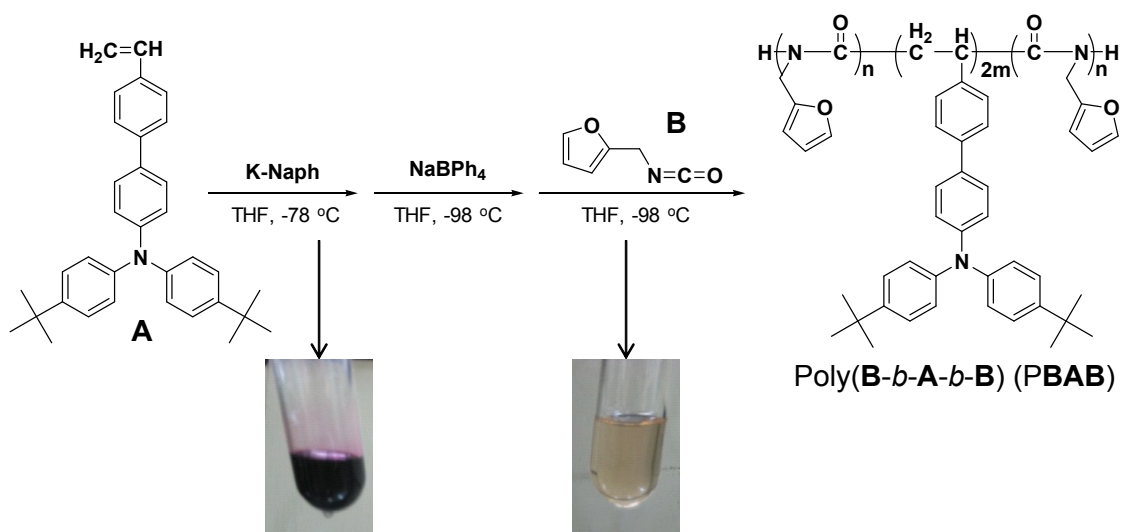

**Figure S1.** The colors of the reaction solutions of block copolymerization of **A** with **B** in the presence of NaBPh<sub>4</sub>.

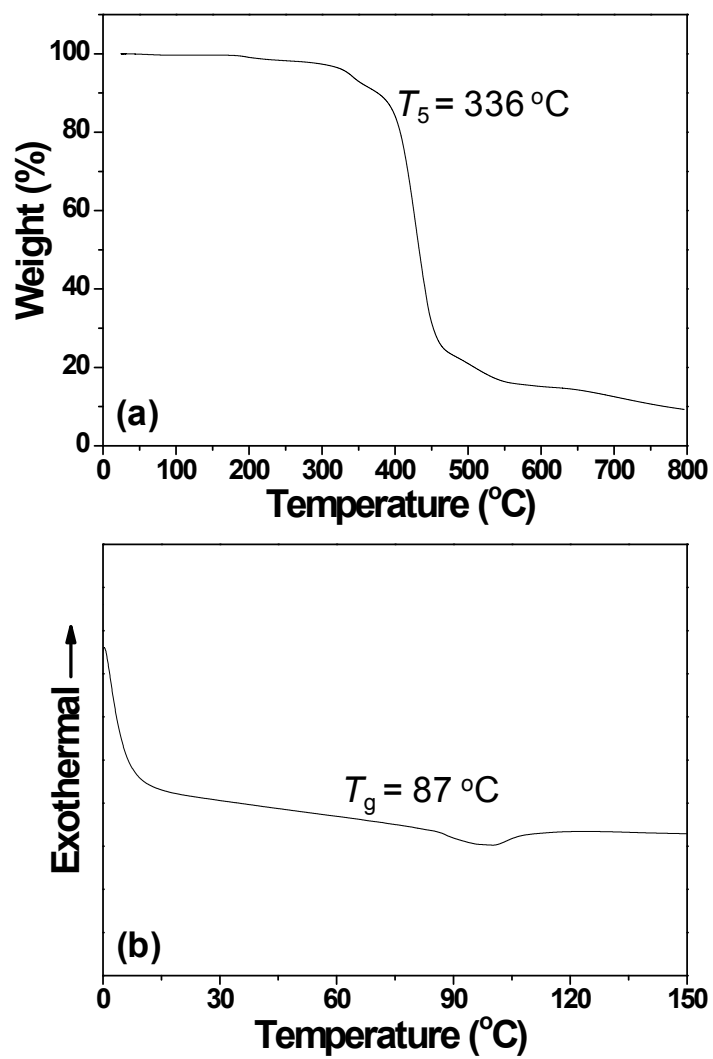

**Figure S2.** (a) TGA and (b) DSC thermograms of PBAB2 under nitrogen atmosphere.
